# Supplementary material
Source: MDPI journal article supplement (https://www.mdpi.com/2673-995X/4/2/37)

## Supplemental Material.

**Supplemental Table S1.** Descriptive information of study sample at baseline n(%)

| <i>Children's Characteristics</i>      | Full sample<br>(n = 202) | Civic sample<br>(n = 169) | Baseline only<br>(n = 33) | p-value             |
|----------------------------------------|--------------------------|---------------------------|---------------------------|---------------------|
| Gender                                 |                          |                           |                           | 0.8185              |
| Girl                                   | 76 (37.6)                | 63 (37.3)                 | 13 (39.4)                 |                     |
| Boy                                    | 126 (62.4)               | 106 (62.7)                | 20 (60.6)                 |                     |
| Age                                    |                          |                           |                           | 0.0909              |
| 11-13                                  | 45 (22.3)                | 41 (24.3)                 | 4 (12.1)                  |                     |
| 14-16                                  | 110 (54.4)               | 93 (55.0)                 | 17 (51.5)                 |                     |
| 17-19                                  | 47 (23.3)                | 35 (20.7)                 | 12 (36.4)                 |                     |
| Mean (SD)                              | 14.9 (1.8)               | 14.8 (1.8)                | 15.6 (1.8)                |                     |
| Primary language                       |                          |                           |                           | 0.0564              |
| English                                | 172 (85.2)               | 148 (87.6)                | 24 (72.7)                 |                     |
| Spanish                                | 30 (14.8)                | 21 (12.4)                 | 9 (27.3)                  |                     |
| Farm work status                       |                          |                           |                           | 0.1209              |
| Migrant                                | 36 (17.8)                | 27 (16.0)                 | 9 (27.3)                  |                     |
| Seasonal                               | 166 (82.2)               | 142 (84.0)                | 24 (72.7)                 |                     |
| Country of origin                      |                          |                           |                           | 0.1739 <sup>1</sup> |
| US                                     | 164 (81.2)               | 140 (82.8)                | 24 (72.7)                 |                     |
| Mexico                                 | 26 (12.9)                | 23 (13.6)                 | 3 (9.1)                   |                     |
| Guatemala/Honduras/El Salvador         | 12 (5.9)                 | 6 (3.6)                   | 6 (18.2)                  |                     |
| Years in farm work                     |                          |                           |                           | 0.4001              |
| 1                                      | 70 (34.7)                | 61 (36.1)                 | 9 (27.3)                  |                     |
| 2                                      | 53 (26.2)                | 41 (24.3)                 | 12 (36.4)                 |                     |
| 3                                      | 42 (20.8)                | 37 (21.9)                 | 5 (15.2)                  |                     |
| 4+                                     | 37 (18.3)                | 30 (17.7)                 | 7 (21.2)                  |                     |
| Mean (SD)                              | 2.5 (1.7)                | 2.5 (1.8)                 | 2.5 (1.4)                 |                     |
| Work primarily to contribute to family |                          |                           |                           | 0.9785              |
| Yes                                    | 122 (60.4)               | 102 (60.4)                | 20 (60.6)                 |                     |
| No                                     | 80 (39.6)                | 67 (39.6)                 | 13 (39.4)                 |                     |
| Educational attainment                 |                          |                           |                           | 0.1428              |
| 3-7                                    | 43 (21.3)                | 38 (22.5)                 | 5 (15.1)                  |                     |
| 8-9                                    | 74 (36.6)                | 65 (38.5)                 | 9 (27.3)                  |                     |
| 10-12                                  | 85 (42.1)                | 66 (39.0)                 | 19 (57.6)                 |                     |

<sup>1</sup>US vs. Non-US

**Supplemental Figure S1.** Detail on Volunteering: Frequencies and Skew

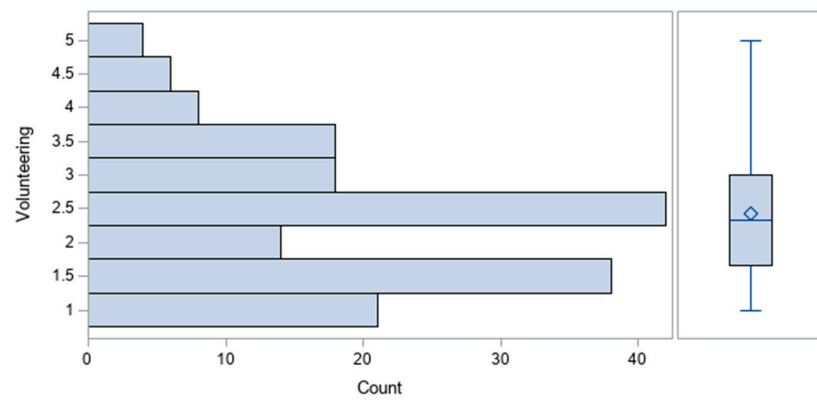

Supplement: s1 [file s1]
